# Supplementary material for: Synthesis and Characterization of New-Type Soluble β-Substituted Zinc Phthalocyanine Derivative of Clofoctol
Source: MDPI journal article supplement (doi:10.3390/molecules28104102), 2023-05-15
Supplement: s1 [file s1]

# Supporting Information

## Synthesis and Characterization of New-Type Soluble $\beta$ -Substituted Zinc Phthalocyanine Derivative of Clofoctol

Sabrina Dridi <sup>1</sup>, Jamel Eddine Khiari <sup>2</sup>, Gabriele Magna <sup>3</sup>, Manuela Stefanelli <sup>3</sup>, Larisa Lvova <sup>3</sup>,  
Federica Mandoj <sup>3</sup>, Khaoula Khezami <sup>4,5</sup>, Mahmut Durmuş <sup>5</sup>, Corrado Di Natale <sup>6</sup> and Roberto Paolesse <sup>3,\*</sup>

- <sup>1</sup> Experimental Sciences and Supramolecular Chemistry, Laboratory of Didactic Research, Higher Institute of Education and Continuing Training (ISEFC), University of Tunis El Manar, Tunis 1002, Tunisia; sabrinegandour@gmail.com
- <sup>2</sup> Experimental Sciences and Supramolecular Chemistry, Laboratory of Didactic Research, Higher Institute of Education and Continuing Training (ISEFC), University of Carthage, Tunis 1054, Tunisia; jamelkhiari@yahoo.fr
- <sup>3</sup> Department of Chemical Science and Technologies, University of Rome Tor Vergata, 00133 Rome, Italy; gabriele.magna@uniroma2.it (G.M.); manuela.stefanelli@uniroma2.it (M.S.); larisa.lvova@uniroma2.it (L.L.); federica.mandoj@uniroma2.it (F.M.)
- <sup>4</sup> Department of Chemistry, Faculty of Engineering and Natural Sciences, Istinye University, 34396 Istanbul, Turkey; khaoula@gtu.edu.tr
- <sup>5</sup> Department of Chemistry, Gebze Technical University, 41400 Kocaeli, Turkey; durmus@gtu.edu.tr
- <sup>6</sup> Department of Electronic Engineering, University of Rome Tor Vergata, 00133 Rome, Italy; dinatale@uniroma2.it
- \* Correspondence: roberto.paolesse@uniroma2.it

## Table of Contents

|                                                                                             | Page |
|---------------------------------------------------------------------------------------------|------|
| <b>Figure S1.</b> FT-IR spectrum of compounds <b>3</b> and <b>4</b>                         | 2    |
| <b>Figure S2.</b> MALDI-TOF mass spectrum of compound <b>3</b>                              | 2    |
| <b>Figure S3.</b> MALDI-TOF mass spectrum of compound <b>4</b>                              | 3    |
| <b>Figure S4.</b> <sup>1</sup> H NMR spectrum of <b>3</b> in CDCl <sub>3</sub> , at 298 K.  | 3    |
| <b>Figure S5.</b> <sup>13</sup> C NMR spectrum of <b>3</b> in CDCl <sub>3</sub> , at 298 K. | 4    |

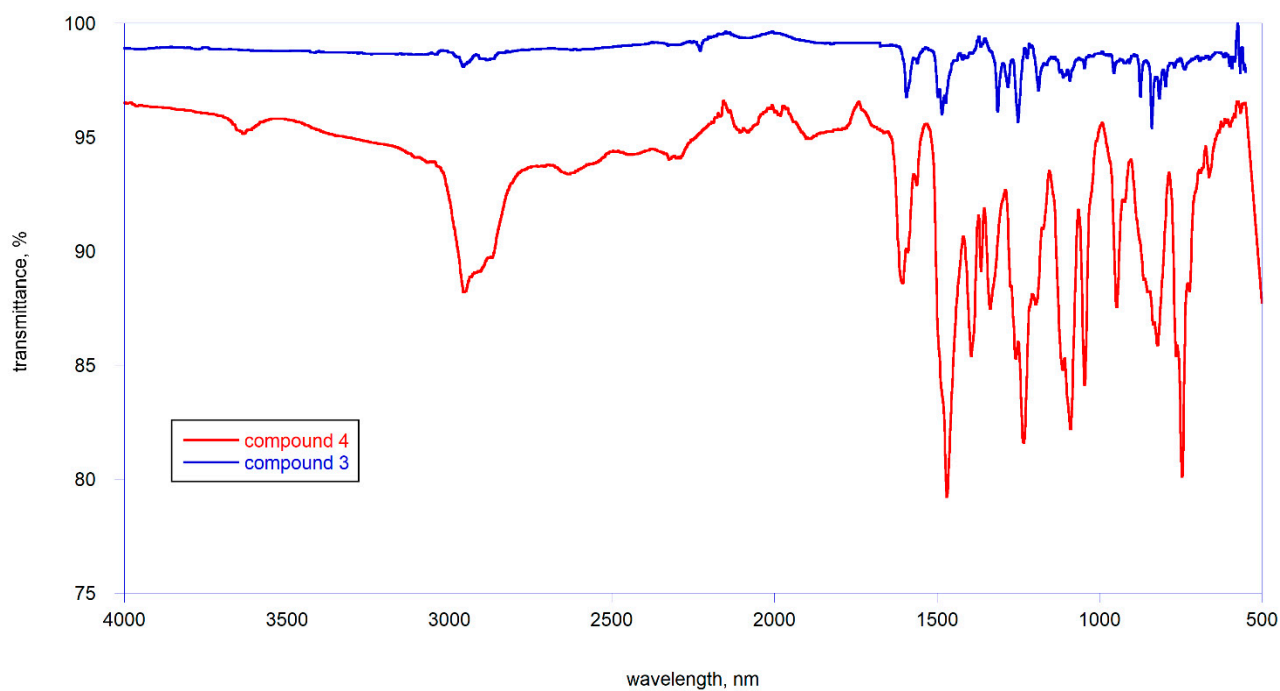

Figure S1. FT-IR spectrum of compounds 3 (blue line) and 4 (red line)

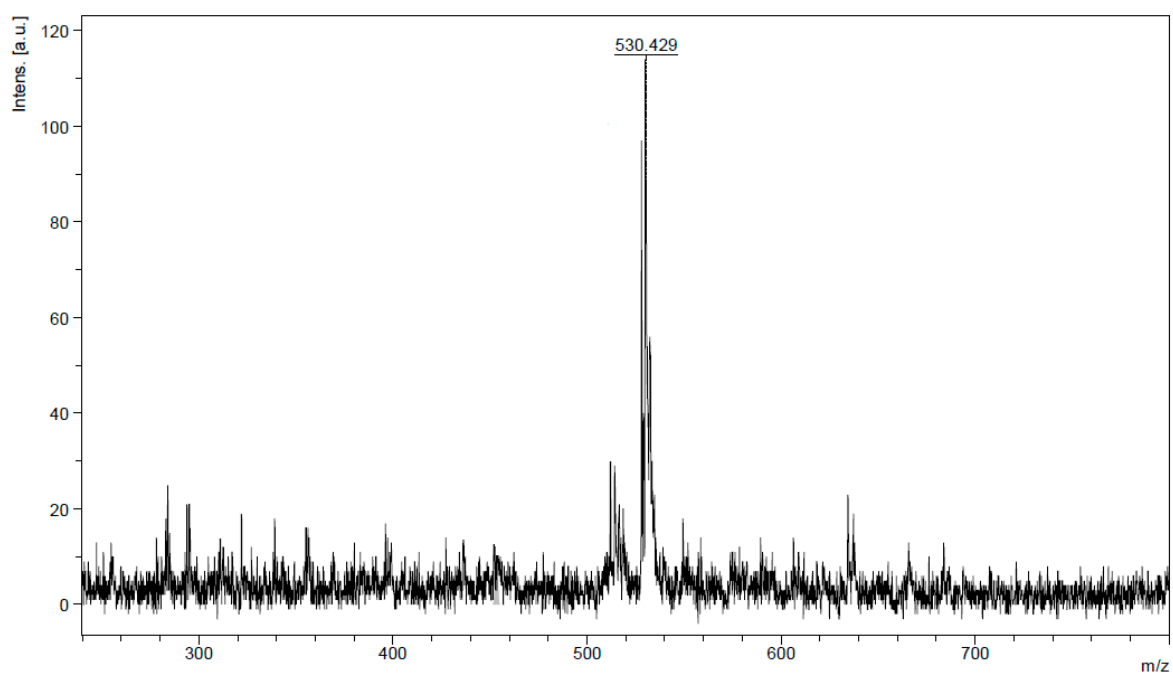

Figure S2. MALDI-TOF mass spectrum of compound 3

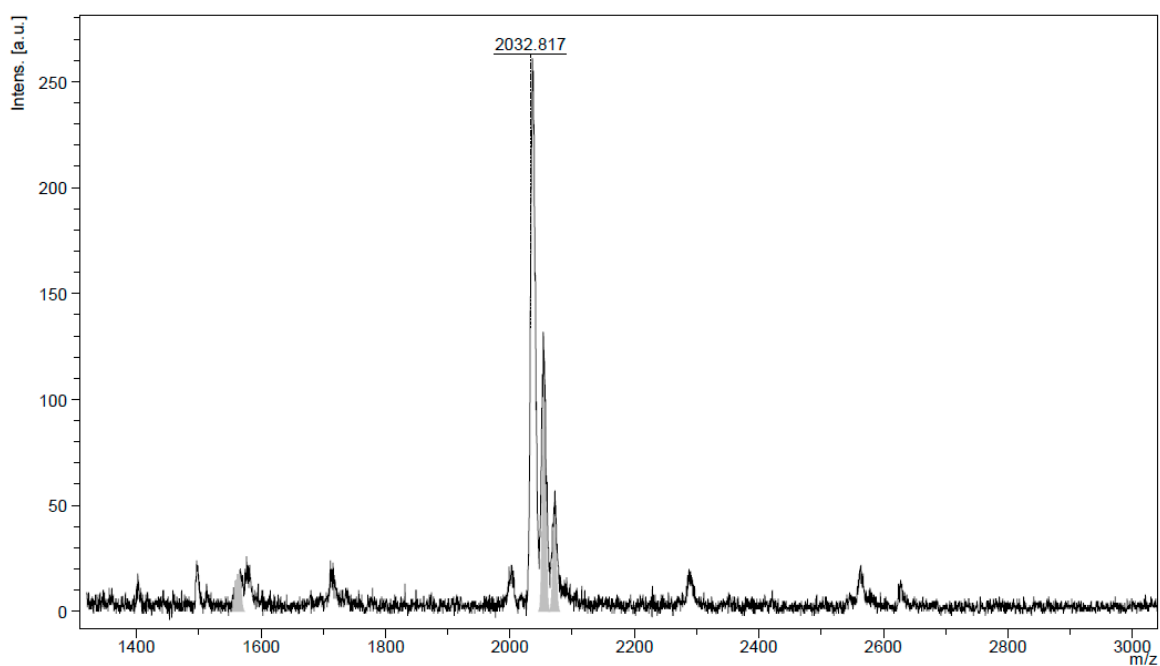

Figure S3. MALDI-TOF mass spectrum of compound 4

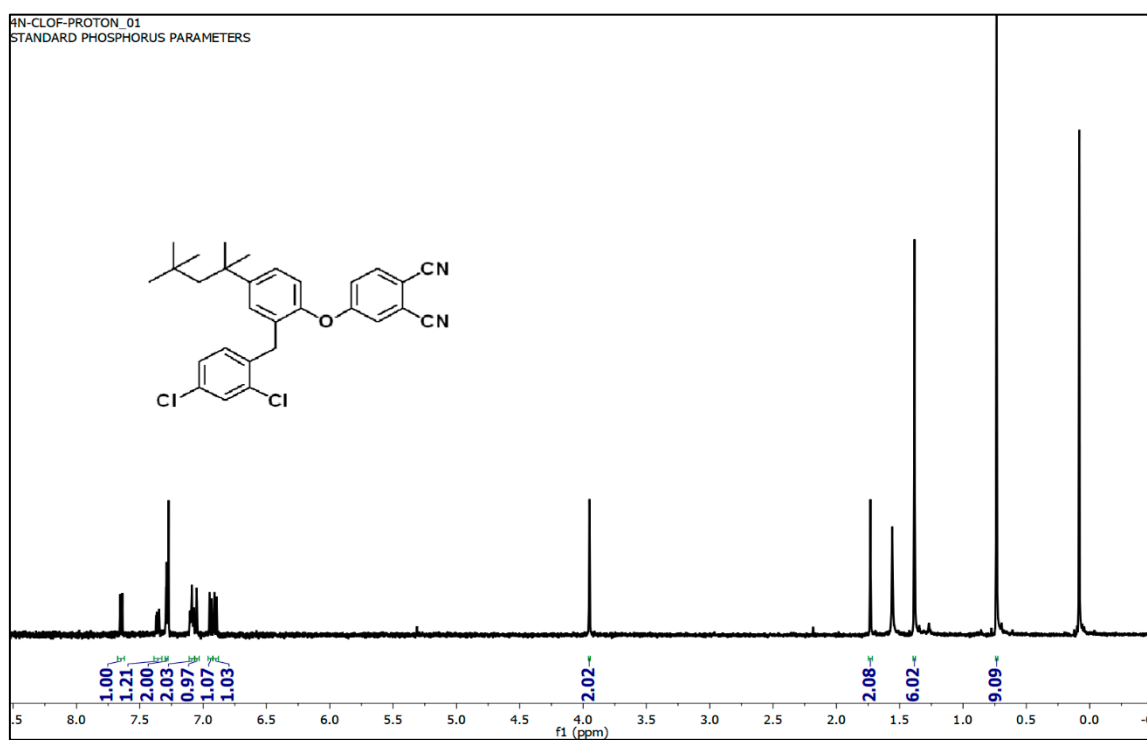

Figure S4.  $^1\text{H}$ -NMR spectrum of compound 3 in  $\text{CDCl}_3$

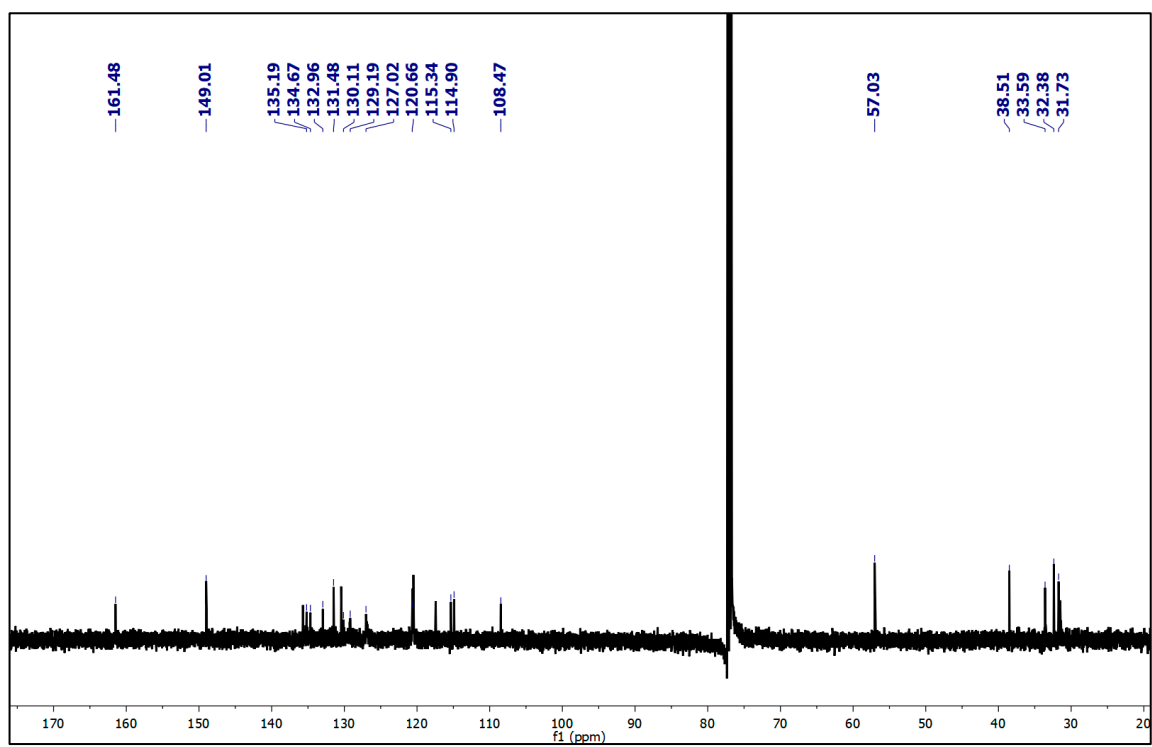

Figure S5.  $^{13}\text{C}$ -NMR spectrum of compound 3 in  $\text{CDCl}_3$
